# Supplementary material
Source: Springer Nature journal article supplement (https://www.springermedizin.de/resource/supplementary/12889_2012_4702_MOESM3_ESM.pdf/9493730)

# Integra Initiative Conceptual Framework

## 1. Readiness

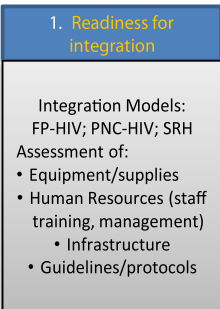

## 2. Implementation Process

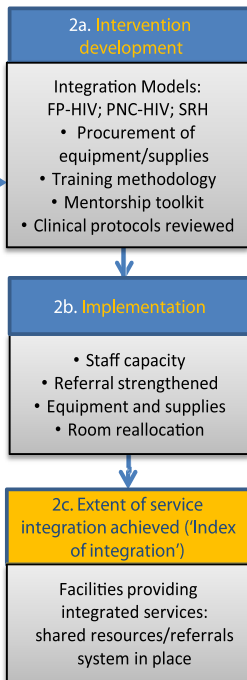

## 3. Service outcomes

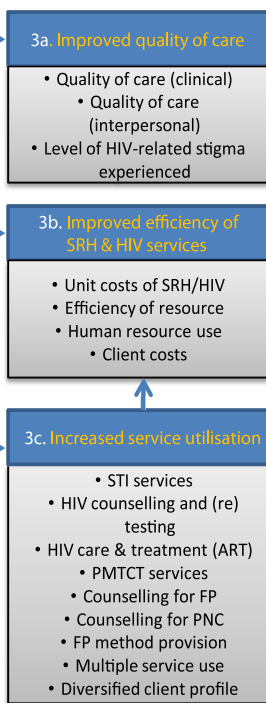

## 4. Health & behaviour outcomes

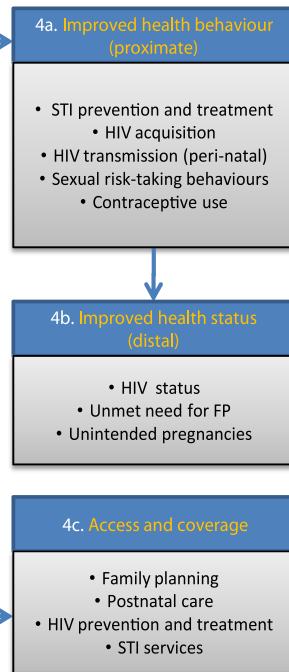

Supplement: MOESM3 [file 9493730]
